# Supplementary material for: Inhibition of laser induced rats choroidal neovascularization by intravitreous injection of sEphB4-HSA
Source: PubMed Central journal article supplement — Ann Transl Med. 2021 Jan;9(1):18. doi: 10.21037/atm-20-3810 (PMC7859820; doi:10.21037/atm-20-3810), 2021-01
Supplement: atm-09-01-18-dss.pdf [file atm-09-01-18-dss.pdf]

## Data Sharing Statement

|                     |                                                                                                                                                    |                                                            |
|---------------------|----------------------------------------------------------------------------------------------------------------------------------------------------|------------------------------------------------------------|
| <b>Article Info</b> | http://dx.doi.org/10.21037/atm-20-3810                                                                                                             |                                                            |
| <b>Item</b>         | <b>Question</b>                                                                                                                                    | <b>Authors' Response<br/>(place "-" if not applicable)</b> |
| 1                   | Would you like to share data collected for your study to others?                                                                                   | No.                                                        |
| 2                   | If not, would you like to share the reason for your decision?                                                                                      | For grant application.                                     |
| 3                   | What data in particular will be shared?                                                                                                            | No.                                                        |
| 4                   | Any other documents will be share? Such as study protocol, statistical analysis plan, informed consent form, clinical study report, analytic code. | The protocol of laser induced CNV.                         |
| 5                   | When will data availability begin?                                                                                                                 | -                                                          |
| 6                   | When will data availability end?                                                                                                                   | -                                                          |
| 7                   | To whom will you share the data?                                                                                                                   | -                                                          |
| 8                   | For what type of analysis or purpose?                                                                                                              | Laser induced rat CNV model.                               |
| 9                   | How or where can the data/documents be obtained?                                                                                                   | <a href="mailto:shikunhe@usc.edu">shikunhe@usc.edu</a>     |
| 10                  | Any other restrictions?                                                                                                                            | -                                                          |
